# Supplementary material
Source: PubMed Central journal article supplement (PMC5664401)
Supplement: 2017_167882-Disclosures_and_Contributions.pdf [file 2017_167882-Disclosures_and_Contributions.pdf]

Haematologica  
HAEMATOL/2017/167882  
Version 3

Erythropoietin stimulates murine and human Fibroblast growth factor-23, revealing novel roles for bone and bone marrow

Erica L. Clinkenbeard, Mark R. Hanudel, Keith R. Stayrook, Hitesh Nidumanda Appaiah, Emily G. Farrow, Taryn A. Cass, Lelia J. Summers, Colin S. Ip, Julia M. Hum, Joseph C. Thomas, Mircea Ivan, Briana M. Richine, Rebecca J. Chan, Thomas L. Clemens, Ernestina Schipani, Yves Sabbagh, Linlin Xu, Edward F. Srour, Marta B. Alvarez, Melissa A. Kacena, Isidro B. Salusky, Tomas Ganz, Elizabeta Nemeth, and Kenneth E. White

Disclosures: KEW receives royalties from Kyowa Hakko Kirin Co. Ltd for licensing the FGF23 gene. YS is an employee of Sanofi Genzyme. KRS is an employee of Eli Lilly&Co. The other authors have nothing to declare.

Contributions: ELC, KRS, HNA, MRH, EGF, JMH, RJC, TLC, ES, YS, SCS, EFS, MAK, IBS, TG, EN and KEW designed research; ELC, KRS, HNA, MRH, EGF, TAC, LJC, CSI, JMH, JCT, MI, BMR, RJC, LX, MBA, and KEW performed research; TLC and ES provided critical reagents; ELC, HNA, EGF, CSI, JMH, JCT, and KEW analyzed data; and ELC, KRS, HNA, MRH, IBS, MAK, TG, EN, KEW wrote the paper.
